# Supplementary material for: Activated protein C plays no major roles in the inhibition of coagulation or increased fibrinolysis in acute coagulopathy of trauma-shock: a systematic review
Source: Springer Nature journal article supplement (doi:10.1186/s12959-018-0167-3), 2018-04-19
Supplement: MOESM2 [file 15854326]

Supplement Table 2 Assessment of study quality using the Newcastle-Ottawa quality assessment scale

| Selection          |                                                        | Comparability                                              |                                          | Outcome                                                                     |                                                             | Total score                                                 |                                             |                                                                |                                                      |                       |             |
|--------------------|--------------------------------------------------------|------------------------------------------------------------|------------------------------------------|-----------------------------------------------------------------------------|-------------------------------------------------------------|-------------------------------------------------------------|---------------------------------------------|----------------------------------------------------------------|------------------------------------------------------|-----------------------|-------------|
| Cohort study       | is representative of a general adult trauma population | ACOTS and non-ACOTS were selected from the same population | ACOTTS were obtained from secure record) | Demonstration of that outcome of interest was not present at start of study | Comparability of cohorts on the basis of design or analysis | Assessment of outcomes                                      | Follow up long enough for outcomes to occur | Adequacy of follow up of cohorts                               | Total score                                          |                       |             |
| 8                  | *                                                      |                                                            | *                                        |                                                                             |                                                             |                                                             |                                             |                                                                | 2                                                    |                       |             |
| 9                  |                                                        |                                                            | *                                        |                                                                             |                                                             |                                                             |                                             |                                                                | 1                                                    |                       |             |
| 10                 | *                                                      |                                                            | *                                        |                                                                             |                                                             |                                                             |                                             |                                                                | 2                                                    |                       |             |
| 36                 | *                                                      |                                                            | *                                        |                                                                             |                                                             |                                                             |                                             |                                                                | 2                                                    |                       |             |
| 38                 |                                                        |                                                            | *                                        |                                                                             |                                                             |                                                             |                                             |                                                                | 1                                                    |                       |             |
| 39                 | *                                                      | *                                                          | *                                        |                                                                             | *                                                           |                                                             |                                             |                                                                | 4                                                    |                       |             |
| 41                 | *                                                      | *                                                          | *                                        |                                                                             | *                                                           |                                                             |                                             |                                                                | 4                                                    |                       |             |
| 45                 | *                                                      |                                                            | *                                        |                                                                             | *                                                           |                                                             |                                             |                                                                | 2                                                    |                       |             |
| 46                 | *                                                      |                                                            | *                                        |                                                                             | *                                                           |                                                             |                                             |                                                                | 2                                                    |                       |             |
| 45                 | *                                                      |                                                            | *                                        |                                                                             | *                                                           |                                                             |                                             |                                                                | 2                                                    |                       |             |
| 48                 | *                                                      |                                                            | *                                        |                                                                             | *                                                           |                                                             |                                             |                                                                | 2                                                    |                       |             |
| Selection          |                                                        | Comparability                                              |                                          | Exposure                                                                    |                                                             | Total score                                                 |                                             |                                                                |                                                      |                       |             |
| Case-control study | Adequate definition                                    | ACOTS                                                      | Representativeness of the ACOTS          | Selection of non-ACOTS                                                      | Definition of ACOTS                                         | Comparability of cohorts on the basis of design or analysis | Exposure                                    | Assessment of exposure (data were obtained from secure record) | Same method of ascertainment for ACOTS and non-ACOTS | Non-response for rate | Total score |
| 35                 | *                                                      |                                                            | *                                        | *                                                                           | *                                                           | *                                                           | *                                           | *                                                              | *                                                    | *                     | 7           |
| 37                 |                                                        |                                                            |                                          |                                                                             |                                                             |                                                             | *                                           | *                                                              |                                                      |                       | 1           |
| 40                 | *                                                      |                                                            |                                          | *                                                                           | *                                                           | *                                                           | *                                           | *                                                              | *                                                    | *                     | 7           |
| 42                 | *                                                      | *                                                          | *                                        | *                                                                           | *                                                           | *                                                           | *                                           | *                                                              | *                                                    | *                     | 7           |
| 43                 | *                                                      | *                                                          | *                                        | *                                                                           | *                                                           | *                                                           | *                                           | *                                                              | *                                                    | *                     | 7           |
| 44                 | *                                                      | *                                                          | *                                        | *                                                                           | *                                                           | *                                                           | *                                           | *                                                              | *                                                    | *                     | 7           |

A maximum of 2 stars can be allotted in the Comparability category. ACOTS is used as a representative terminology of other terminologies such as acute traumatic coagulopathy and acute coagulopathy of trauma defined in individual studies.
